# Supplementary material for: An electrochemical synthesis of a rare-earth(La3+)-doped ZIF-8 hydroxyapatite composite coating for a Ti/TiO2 implant material
Source: Royal Society of Chemistry journal article supplement (doi:10.1039/d0nj05274d), 2021-01-01
Supplement: d0nj05274d1.pdf [file d0nj05274d1.pdf]

## Electrochemical synthesis of rare earth( $\text{La}^{3+}$ ) doped ZIF-8 hydroxyapatite composite coating for Ti/ $\text{TiO}_2$ implant material

Ziqi Zhang<sup>a</sup>, Xiang Ni<sup>a</sup>, Kaida Yao<sup>a</sup>, Siqi Zhang<sup>a</sup>, Yang Liu<sup>a</sup>, Yueqiu Sun<sup>a</sup>,  
Xiangzhi Wang<sup>a</sup>, Weimin Huang<sup>\*a,b</sup>, Yan Zhang<sup>\*c</sup>

a. College of Chemistry, Jilin University, Changchun 130012, China

b. Key Laboratory of Physics and Technology for Advanced Batteries of  
Ministry of Education, Jilin University, Changchun 130012, China

c. Hospital of Stomatology, Jilin University, Changchun 130021, China

Email: huangwm@jlu.edu.cn; zhangyan330201@jlu.edu.cn

Ziqi Zhang and Xiang Ni contributed to the work equally and should be regarded as co-first authors.

New Journal of Chemistry

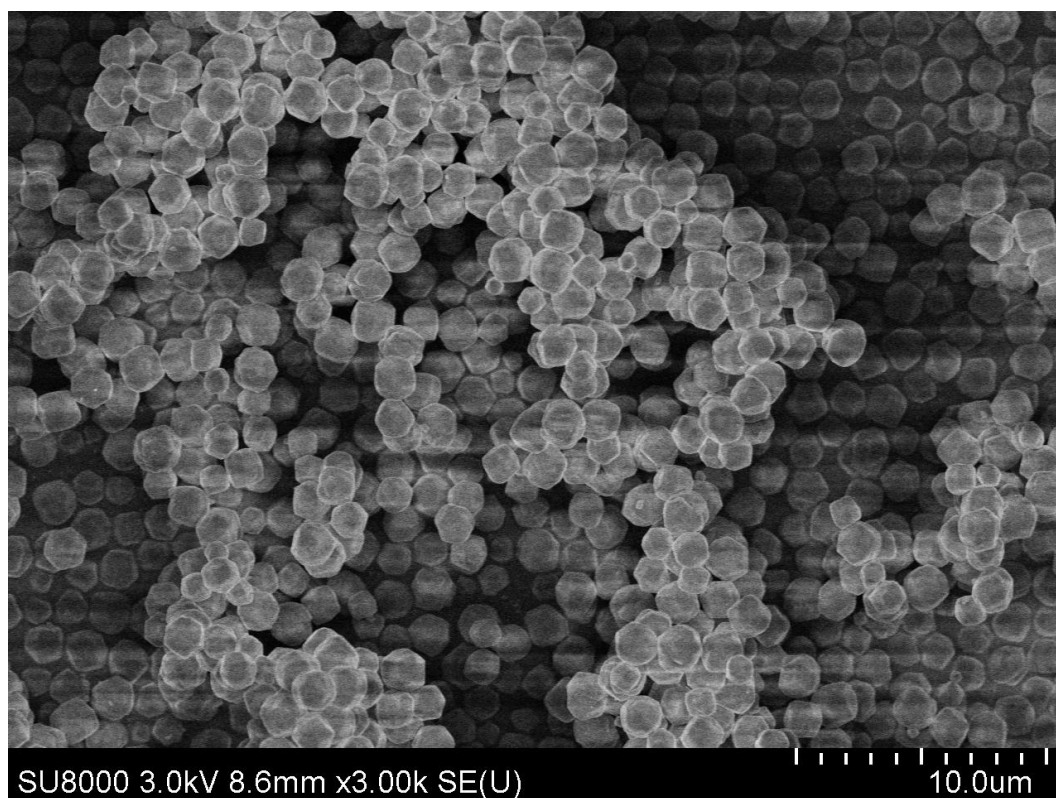

**Figure.S1** SEM images of ZIF-8 nanoparticles in full view

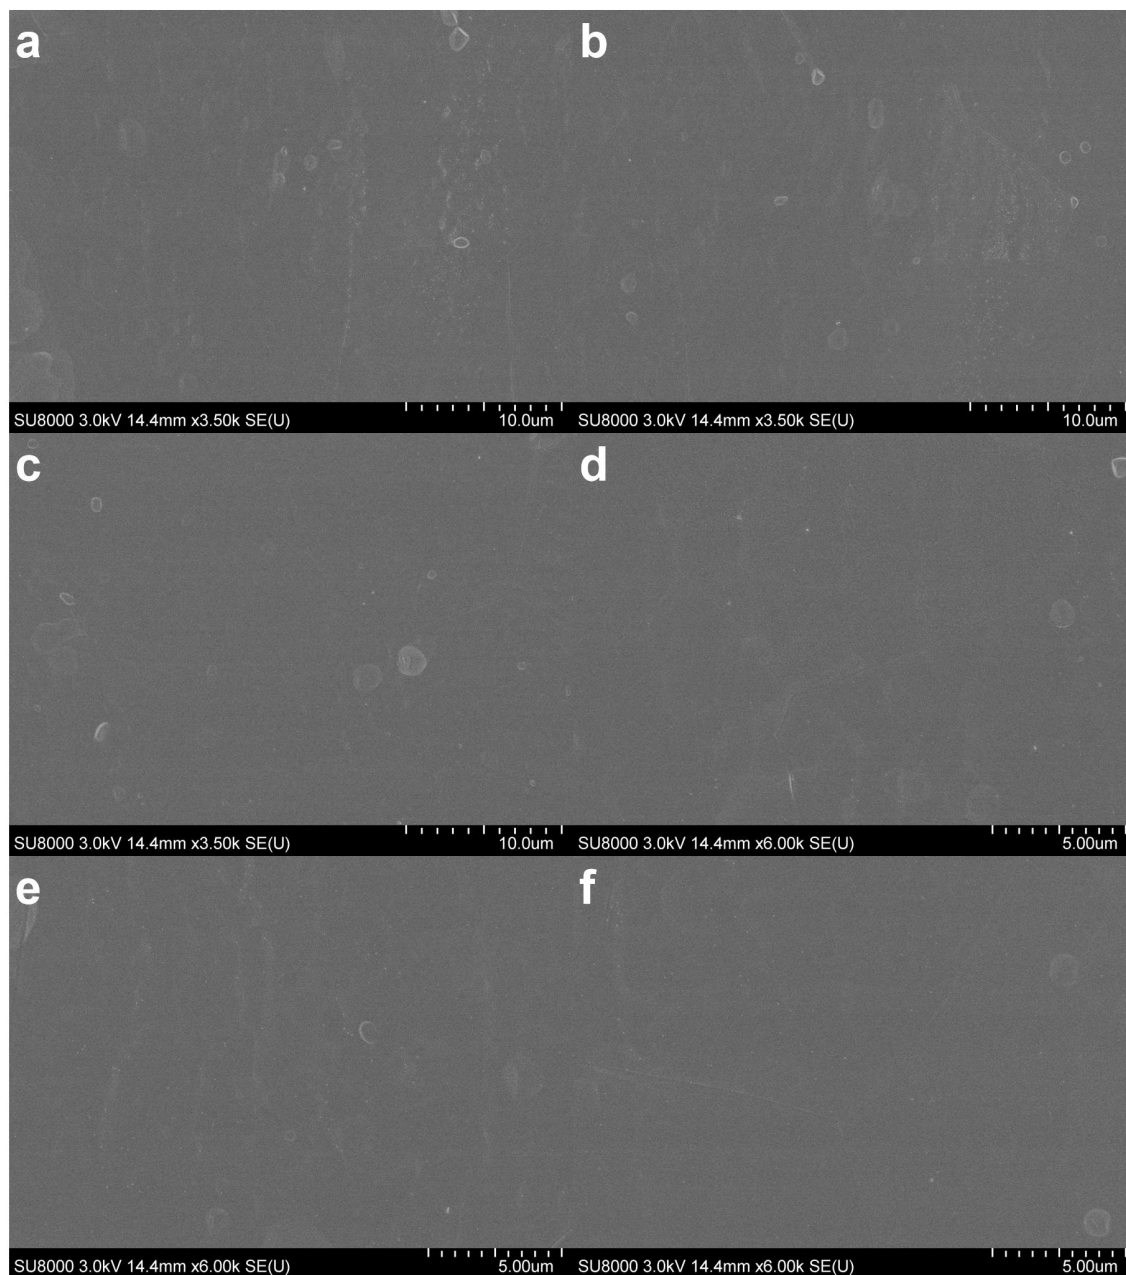

**Figure.S2** SEM images of bare Ti in different magnification

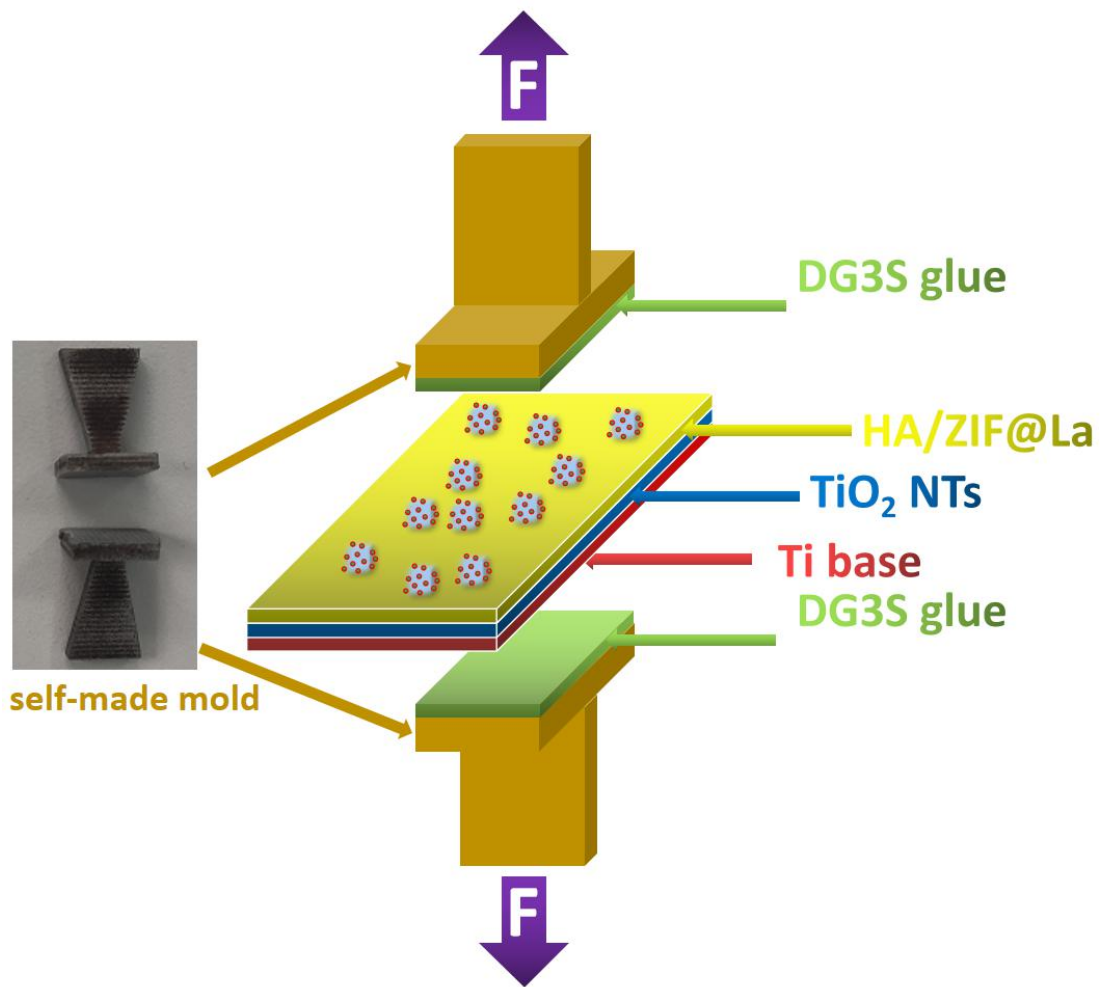

**Figure.S3** the schematic diagram of the binding strength test
